# Supplementary material
Source: MDPI journal article supplement (https://www.mdpi.com/2075-5309/13/2/327)
Supplement: s1 [file s1 › buildings-2133901-supplementary.pdf]

**Supplemental materials for**  
**Quantitative risk evaluation by building type**  
**based on probability and cost of accidents**

Jayho Soh<sup>1</sup>; Jaewook Jeong<sup>2\*</sup>; Jaemin Jeong<sup>3</sup>; and Jaehyun Lee<sup>4</sup>

6 pages

4 tables

TABLE Captions

Table S1. Example of collected accident data

Table S2. Annual construction cost of South Korea

Table S3. Code name for accident occurrence, no accident, and facility type

Table S4. Accident cost items in the construction industry

**Table S1.** Example of collected accident data

| <b>Number</b> | <b>Project name</b> | <b>Facility type</b>    | <b>Work type</b>  | <b>Accident date</b> | <b>Severity</b> |
|---------------|---------------------|-------------------------|-------------------|----------------------|-----------------|
| 1             | "A"<br>construction | Residential<br>building | Temporary<br>work | 2019.05.30           | Fatality        |
| 2             | "B"<br>construction | Factories               | Earth work        | 2020.10.20           | Injury          |
| ...           |                     |                         |                   |                      |                 |
| 5 082         | "C"<br>construction | Business<br>facilities  | Landscape<br>work | 2020.01.29           | Injury          |
| 5 083         | "D"<br>construction | Lodging<br>facilities   | Stonework         | 2021.03.24           | Fatality        |

**Table S2.** Annual construction costs in South Korea

| <b>Year</b> | <b>Annual construction costs (million dollars)</b> |
|-------------|----------------------------------------------------|
| 2017        | 163,988                                            |
| 2018        | 165,319                                            |
| 2019        | 162,588                                            |
| Average     | 163,965                                            |

**Table S3.** Code name for accident occurrence, no accident, and facility type

| <b>Name</b>                                               | <b>Code</b> |
|-----------------------------------------------------------|-------------|
| Accident occurrence                                       | A1          |
| No accident                                               | A2          |
| Residential buildings                                     | B1          |
| Factories                                                 | B2          |
| Tourist resting facilities                                | B3          |
| Education and research facilities                         | B4          |
| Neighborhood living facilities                            | B5          |
| Houses                                                    | B6          |
| Cultural and assembly facilities                          | B7          |
| Lodging facilities                                        | B8          |
| Business facilities                                       | B9          |
| Sports facilities                                         | B10         |
| Transportation facilities                                 | B11         |
| Storage and treatment facilities for hazardous substances | B12         |
| Medical facilities                                        | B13         |
| Religious facilities                                      | B14         |
| Warehouse facilities                                      | B15         |
| Sales facilities                                          | B16         |
| Miscellaneous facilities                                  | B17         |

**Table S4.** Accident cost items in construction industry

| Cost items                             |                               |                          |                         |
|----------------------------------------|-------------------------------|--------------------------|-------------------------|
| Productivity loss cost                 | Labor loss cost               | Income loss cost         | Worker                  |
|                                        |                               | Tax                      | Government              |
|                                        |                               | Health insurance         | Government              |
|                                        |                               | National pension         | Government              |
|                                        |                               | Employment insurance     | Government              |
|                                        |                               | Human cost               | Worker                  |
| Compensation cost                      | Industrial accident insurance |                          | Government              |
|                                        | Worker's compensation cost    |                          | Government              |
|                                        | Settlement cost               |                          | Employer                |
| Business loss and administrative costs | Business loss cost            | Legal cost               | Employer                |
|                                        |                               | Delay reimbursement cost | Employer                |
|                                        |                               | Insurance premium cost   | Government              |
|                                        |                               | Administrative cost      | Employer/<br>Government |
